# Supplementary material for: Body mass index time in target range and incident hypertension in middle-aged and older adults: a longitudinal study
Source: Research Square preprint supplement (doi:10.21203/rs.3.rs-8461092/v1), 2026-01-29
Supplement: Supplementary file 1 [file 1e340bbc2e82f4b9f6c5e8ec.docx]

S-table 5 The association of BMI change with incident hypertension by subgroups.

| Group | Adjusted HRa (95% Cl) | | *P* value | Adjusted HRb (95% Cl) | *P* value | Adjusted HRa (95% Cl) | *P* value | Adjusted HRb (95% Cl) | *P* value |
| --- | --- | --- | --- | --- | --- | --- | --- | --- | --- |
|  | **Male (n=2,086)** | | | | | **Age<60 (n=2,715)** | | | |
| 1 |  | |  |  |  |  |  |  |  |
| 2 | 0.985 (0.749-1.295) | | 0.914 | 0.976 (0.741-1.286) | 0.864 | 0.996 (0.753-1.317) | 0.977 | 0.966 (0.728-1.280) | 0.808 |
| 3 | 1.289 (1.097-1.514) | | 0.002 | 1.270 (1.073-1.503) | 0.005 | 1.504 (1.272-1.779) | 0.000 | 1.409 (1.172-1.694) | <0.001 |
|  | **Female (n=2,283)** | | | | | **Age≥60 (n=1,654)** | | | |
| 1 |  | |  |  |  |  |  |  |  |
| 2 | 1.057 (0.803-1.389) | | 0.694 | 1.056 (0.803-1.389) | 0.697 | 1.057 (0.810-1.379) | 0.683 | 1.059 (0.812-1.381) | 0.673 |
| 3 | 1.401 (1.173-1.672) | | < 0.001 | 1.398 (1.170-1.672) | <0.001 | 1.160 (0.979-1.375) | 0.086 | 1.164 (0.982-1.381) | 0.081 |
| *P* for interaction | | 0.941 | | 0.946 | | 0.030 | | 0.030 | |

| Group | Adjusted HRa (95% Cl) | *P* value | Adjusted HRb (95% Cl) | *P* value | Adjusted HRa (95% Cl) | *P* value | Adjusted HRb (95% Cl) | *P* value |
| --- | --- | --- | --- | --- | --- | --- | --- | --- |
|  | **Male (n=2,086)** | | | | **Age<60 (n=2,715)** | | | |
| 3 |  |  |  |  |  |  |  |  |
| 2 | 0.764 (0.588-0.993) | 0.044 | 0.769 (0.591-0.999) | 0.049 | 0.662 (0.513-0.854) | 0.002 | 0.685 (0.529-0.887) | 0.004 |
| 1 | 0.773 (0.658-0.908) | 0.002 | 0.787 (0.665-0.932) | 0.005 | 0.665 (0.562-0.786) | <0.001 | 0.710 (0.590-0.853) | <0.001 |
|  | **Female (n=2,283)** | | | | **Age≥60 (n=1,654)** | | | |
| 3 |  |  |  |  |  |  |  |  |
| 2 | 0.754 (0.590-0.964) | 0.024 | 0.755 (0.591-0.965) | 0.025 | 0.911 (0.707-1.174) | 0.472 | 0.859 (0.724-1.019) | 0.081 |
| 1 | 0.714 (0.598-0.852) | <0.001 | 0.715 (0.598-0.855) | <0.001 | 0.862 (0.727-1.021) | 0.086 | 0.909 (0.706-1.172) | 0.464 |
| *P* for interaction | 0.845 | | 0.845 | | <0.001 | | <0.001 | |

**Note:** Group 1 is used as the reference group in the above table, and Group 3 is used as the reference group in the following table.

The sustained normal BMI group (Group 1: normal BMI across all three waves，n=1,427), the BMI improvement group (Group 2: abnormal in wave 1 but normal in at least one of waves 2 and 3, n=460), and the other group (Group 3, n=2,482).

TTR time in target range, *HR* hazard ratio, *CI* confidence interval.

a Adjucted for Age, gender, Marital status, education, Area, Ever smoking, Ever drinking, Diabetes mellitus, Dyslipidemia, Cancer or malignant, Chronic lung disease, Liver disease, Kidney disease, Stroke, Heart disease, Memory-related disease，Psychosomatic disease，uric acid (UA), blood urea nitrogen (BUN), glucose, creatinine (Crea), total cholesterol (TC), high-density lipoprotein cholesterol (HDL-C), low-density lipoprotein cholesterol (LDL-C), C-reactive protein (CRP), glycated hemoglobin (HbA1c).

b Adjucted for Age, gender, Marital status, education, Area, Ever smoking, Ever drinking, Diabetes mellitus, Dyslipidemia, Cancer or malignant, Chronic lung disease, Liver disease, Kidney disease, Stroke, Heart disease，Memory-related disease，Psychosomatic disease，uric acid (UA), blood urea nitrogen (BUN), glucose, creatinine (Crea), total cholesterol (TC), high-density lipoprotein cholesterol (HDL-C), low-density lipoprotein cholesterol (LDL-C), C-reactive protein (CRP), glycated hemoglobin (HbA1c) and BMI of wave 1.
