# Supplementary material for: Body mass index time in target range and incident hypertension in middle-aged and older adults: a longitudinal study
Source: Research Square preprint supplement (doi:10.21203/rs.3.rs-8461092/v1), 2026-01-29
Supplement: Supplementary file 2 [file 44e982e898fabcca948ce343.docx]

S-table 4. The association of BMI change with incident hypertension.

| Group | Crude HR (95% Cl) | *P* value | Adjusted HRa (95% Cl) | *P* value | Adjusted HRb (95% Cl) | *P* value | Adjusted HRc (95% Cl) | *P* value |
| --- | --- | --- | --- | --- | --- | --- | --- | --- |
| 1 |  |  |  |  |  |  |  |  |
| 2 | 1.042 (0.861-1.261) | 0.671 | 1.022 (0.843-1.238) | 0.827 | 1.020 (0.842-1.236) | 0.838 | 1.016 (0.838-1.231) | 0.875 |
| 3 | 1.352 (1.206 -1.515) | <0.001 | 1.337 (1.188 -1.504) | <0.001 | 1.333 (1.183 -1.501) | <0.001 | 1.308 (1.159-1.475) | <0.001 |

| Group | Crude HR (95% Cl) | *P* value | Adjusted HRa (95% Cl) | *P* value | Adjusted HRb (95% Cl) | *P* value | Adjusted HRc (95% Cl) | *P* value |
| --- | --- | --- | --- | --- | --- | --- | --- | --- |
| 3 |  |  |  |  |  |  |  |  |
| 2 | 0.740 (0.660-0.829) | <0.001 | 0.764 (0.640-0.913) | 0.003 | 0.765 (0.640-0.915) | 0.003 | 0.777 (0.649-0.929) | 0.006 |
| 1 | 0.771 (0.646-0.920) | 0.004 | 0.748 (0.665-0.842) | <0.001 | 0.750 (0.666-0.84) | <0.001 | 0.765 (0.678-0.863) | <0.001 |

**Note:** Group 1 is used as the reference group in the above table, and Group 3 is used as the reference group in the following table. *TTR* time in target range, *OR* Odds Ratio, *CI* confidence interval

The sustained normal BMI group (Group 1: normal BMI across all three waves，n=1,427), the BMI improvement group (Group 2: abnormal in wave 1 but normal in at least one of waves 2 and 3, n=460), and the other group (Group 3, n=2,482).

a Adjucted for Age, gender, Marital status, education, Area, Ever smoking, Ever drinking, Diabetes mellitus, Dyslipidemia, Cancer or malignant, Chronic lung disease, Liver disease, Kidney disease, Stroke, Heart disease, Memory-related disease，Psychosomatic disease，uric acid (UA), blood urea nitrogen (BUN), glucose, creatinine (Crea), total cholesterol (TC), high-density lipoprotein cholesterol (HDL-C), low-density lipoprotein cholesterol (LDL-C), C-reactive protein (CRP), glycated hemoglobin (HbA1c)

b Adjucted for Age, gender, Marital status, education, Area, Ever smoking, Ever drinking, Diabetes mellitus, Dyslipidemia, Cancer or malignant, Chronic lung disease, Liver disease, Kidney disease, Stroke, Heart disease，Memory-related disease，Psychosomatic disease，uric acid (UA), blood urea nitrogen (BUN), glucose, creatinine (Crea), total cholesterol (TC), high-density lipoprotein cholesterol (HDL-C), low-density lipoprotein cholesterol (LDL-C), C-reactive protein (CRP), glycated hemoglobin (HbA1c) and BMI of wave 1.

c Adjucted for Age, gender, Marital status, education, Area, Ever smoking, Ever drinking,Diabetes mellitus, Dyslipidemia, Cancer or malignant, Chronic lung disease, Liver disease, Kidney disease, Stroke, Heart disease，Memory-related disease，Psychosomatic disease，uric acid (UA), blood urea nitrogen (BUN), glucose, creatinine (Crea), total cholesterol (TC), high-density lipoprotein cholesterol (HDL-C), low-density lipoprotein cholesterol (LDL-C), C-reactive protein (CRP), glycated hemoglobin (HbA1c) and BMI of wave 1, 2, and 3.
