# Supplementary material for: Body mass index time in target range and incident hypertension in middle-aged and older adults: a longitudinal study
Source: Research Square preprint supplement (doi:10.21203/rs.3.rs-8461092/v1), 2026-01-29
Supplement: Supplementary file 3 [file 904e54064e2eb5d677a88cd8.docx]

S-table 1. Missing values for variables.（n=4,369）

| Variable | Missing rate, n(%) |
| --- | --- |
| Baseline BMI | 0(0%) |
| BMI of Wave 2 | 0(0%) |
| BMI of Wave 3 | 0(0%) |
| Female | 0(0%) |
| Age | 0(0%) |
| Smoking | 3(0%) |
| Drinking | 7(0%) |
| Marital status | 0(0%) |
| Education | 0(0%) |
| area | 0(0%) |
| Diabetes mellitus | 40(0.9%) |
| Dyslipidemia | 86(1.9%) |
| Cancer or malignant | 18(0.4%) |
| Chronic lung disease | 26(0.5%) |
| Liver disease | 36(0.8%) |
| Kidney disease | 38(0.8%) |
| Stroke | 22(0.5%) |
| Heart disease | 28(0.6%) |
| Memory-related disease | 18(0.4%) |
| Psychosomatic disease | 28(0.6%) |
| BUN | 931(21.3%) |
| Glucose | 938(21.4%) |
| Creatinine | 939(21.4%) |
| TC | 934(21.3%) |
| HDL | 931(21.3%) |
| LDL | 935(21.4%) |
| UA | 643(14.7%) |
| CRP | 932(21.3%) |
| HbA1c | 920(21.0%) |
