# Supplementary material for: Body mass index time in target range and incident hypertension in middle-aged and older adults: a longitudinal study
Source: Research Square preprint supplement (doi:10.21203/rs.3.rs-8461092/v1), 2026-01-29
Supplement: Supplementary file 4 [file a2b45cb4a90099ccb8e1dfcc.docx]

S-table 3. Association between BMI-TTR and incident hypertension risk: subgroup analysis based on logistic regression models.

| Variable | Adjusted ORa (95% Cl) | | *P* value | Adjusted ORb (95% Cl) | *P* value | Adjusted ORa (95% Cl) | *P* value | Adjusted ORb (95% Cl) | *P* value |
| --- | --- | --- | --- | --- | --- | --- | --- | --- | --- |
|  | **Male (n=2,086)** | | | | | **Age<60 (n=2,715)** | | | |
| TTR1 |  | |  |  |  |  |  |  |  |
| TTR2 | 0.842(0.609-1.165) | | 0.300 | 0.852 (0.612-1.186) | 0.342 | 0.665 (0.502-0.881) | 0.004 | 0.701 (0.521-0.944) | 0.019 |
| TTR3 | 0.703 (0.518-0.953) | | 0.023 | 0.713 (0.520-0.978) | 0.036 | 0.732 (0.555-0.966) | 0.028 | 0.784 (0.578-1.064) | 0.118 |
| TTR4 | 0.682 (0.538-0.863) | | 0.001 | 0.694 (0.537-0.897) | 0.005 | 0.572 (0.459-0.713) | <0.001 | 0.620 (0.476-0.809) | <0.001 |
|  | **Female (n=2,283)** | | | | | **Age≥60 (n=1,654)** | | | |
| TTR1 |  | |  |  |  |  |  |  |  |
| TTR2 | 0.838 (0.625-1.123) | | 0.237 | 0.837 (0.623-1.123) | 0.235 | 1.272 (0.897-1.803) | 0.177 | 1.265 (0.891-1.795) | 0.188 |
| TTR3 | 0.677 (0.498-0.920) | | 0.013 | 0.675 (0.496-0.920) | 0.013 | 0.666 (0.476-0.993) | 0.018 | 0.662 (0.472-0.929) | 0.017 |
| TTR4 | 0.622 (0.490-0.788) | | <0.001 | 0.620 (0.487-0.789) | <0.001 | 0.799 (0.619-1.031) | 0.084 | 0.793 (0.613-1.026) | 0.078 |
| *P* for interaction | | 0.972 | | 0.972 | | 0.000 | | 0.000 | |

Note: *TTR* time in target range, *OR* Odds Ratio, *CI* confidence interval

a Adjucted for Age, gender, Marital status, education, Area, Ever smoking, Ever drinking, Diabetes mellitus, Dyslipidemia, Cancer or malignant, Chronic lung disease, Liver disease, Kidney disease, Stroke, Heart disease, Memory-related disease，Psychosomatic disease，uric acid (UA), blood urea nitrogen (BUN), glucose, creatinine (Crea), total cholesterol (TC), high-density lipoprotein cholesterol (HDL-C), low-density lipoprotein cholesterol (LDL-C), C-reactive protein (CRP), glycated hemoglobin (HbA1c)

b Adjucted for Age, gender, Marital status, education, Area, Ever smoking, Ever drinking, Diabetes mellitus, Dyslipidemia, Cancer or malignant, Chronic lung disease, Liver disease, Kidney disease, Stroke, Heart disease，Memory-related disease，Psychosomatic disease，uric acid (UA), blood urea nitrogen (BUN), glucose, creatinine (Crea), total cholesterol (TC), high-density lipoprotein cholesterol (HDL-C), low-density lipoprotein cholesterol (LDL-C), C-reactive protein (CRP), glycated hemoglobin (HbA1c) and BMI of wave 1.
