# Supplementary material for: Body mass index time in target range and incident hypertension in middle-aged and older adults: a longitudinal study
Source: Research Square preprint supplement (doi:10.21203/rs.3.rs-8461092/v1), 2026-01-29
Supplement: Supplementary file 5 [file bc37d7485bef74e4d7f49497.docx]

S-table 2. Association between BMI-TTR and incident hypertension: Logistic regression analysis

| Variable | Crude OR  (95% Cl) | *P* value | Adjusted ORa  (95% Cl) | *P* value | Adjusted ORb  (95% Cl) | *P* value | Adjusted ORc  (95% Cl) | *P* value |
| --- | --- | --- | --- | --- | --- | --- | --- | --- |
| TTR1 |  |  |  |  |  |  |  |  |
| TTR2 | 0.789（0.647,0.963） | 0.020 | 0.843（0.680,1.046） | 0.121 | 0.844（0.679,1.048） | 0.125 | 0.909（0.727,1.137） | 0.405 |
| TTR3 | 0.674（0.553,0.820） | <0.001 | 0.685（0.553,0.849） | 0.001 | 0.686（0.552,0.852） | 0.001 | 0.765（0.607,0.964） | 0.023 |
| TTR4 | 0.633（0.546,0.734） | <0.001 | 0.648（0.550,0.765） | <0.001 | 0.649（0.548,0.768） | <0.001 | 0.740（0.610,0.897） | 0.002 |

Note: *TTR* time in target range, *OR* Odds Ratio, *CI* confidence interval

a Adjucted for Age, gender, Marital status, education, Area, Ever smoking, Ever drinking, Diabetes mellitus, Dyslipidemia, Cancer or malignant, Chronic lung disease, Liver disease, Kidney disease, Stroke, Heart disease, Memory-related disease，Psychosomatic disease，uric acid (UA), blood urea nitrogen (BUN), glucose, creatinine (Crea), total cholesterol (TC), high-density lipoprotein cholesterol (HDL-C), low-density lipoprotein cholesterol (LDL-C), C-reactive protein (CRP), glycated hemoglobin (HbA1c)

b Adjucted for Age, gender, Marital status, education, Area, Ever smoking, Ever drinking, Diabetes mellitus, Dyslipidemia, Cancer or malignant, Chronic lung disease, Liver disease, Kidney disease, Stroke, Heart disease，Memory-related disease，Psychosomatic disease，uric acid (UA), blood urea nitrogen (BUN), glucose, creatinine (Crea), total cholesterol (TC), high-density lipoprotein cholesterol (HDL-C), low-density lipoprotein cholesterol (LDL-C), C-reactive protein (CRP), glycated hemoglobin (HbA1c) and BMI of wave 1.

c Adjucted for Age, gender, Marital status, education, Area, Ever smoking, Ever drinking,Diabetes mellitus, Dyslipidemia, Cancer or malignant, Chronic lung disease, Liver disease, Kidney disease, Stroke, Heart disease，Memory-related disease，Psychosomatic disease，uric acid (UA), blood urea nitrogen (BUN), glucose, creatinine (Crea), total cholesterol (TC), high-density lipoprotein cholesterol (HDL-C), low-density lipoprotein cholesterol (LDL-C), C-reactive protein (CRP), glycated hemoglobin (HbA1c) and BMI of wave 1, 2, and 3.
